# Supplementary material for: Effect of music interventions on anxiety during labor: a systematic review and meta-analysis of randomized controlled trials
Source: PeerJ. 2019 May 15;7:e6945. doi: 10.7717/peerj.6945 (PMC6525590; doi:10.7717/peerj.6945)
Supplement: Supplemental Information 1 [file peerj-07-6945-s001.xlsx]

## Sheet: anxiety level
article	meane	sde	ne	meanc	sdc	nc	delivery type	music type	outcome measure scale	mean age
Wan 2018	3.4	0.4	60	4.8	0.8	59	NSD	patient choose	VASA	25.8
Simavli, Ikbal 2014	3.3	0.46	71	4.89	0.93	70	NSD	patient choose	VASA	23.8
Simavli, Gumus 2014	1.65	0.31	67	4.16	0.84	65	NSD	patient choose	VASA	25.1
Reza 2007	0.1	0.707	50	0.38	1.589	50	CS	not patient choose	VASA	25.5
Chang 2005	1.82	2.71	32	2.93	2.93	32	CS	patient choose	VASA	31.3
Hepp 2018	1.27	1.2	154	1.76	1.78	150	CS	patient choose	VASA	33.6
Gokyildiz Surucu 2018	43.2	6.91	25	66.48	7.81	25	NSD	unknown	STAI	NR
Hepp 2018	31.56	6.3	154	34.41	6.23	150	CS	patient choose	STAI	33.6
Li 2012	43.63	3.26	30	50.63	2.13	30	CS	patient choose	SAS	NR
Karkal 2017	28.26	2.24	30	61.87	0.55	30	NSD	unknown	SAS	NR

## Sheet: HR
article		meane	sde	ne	meanc	sdc	nc	delivery type	music type
simvali, Gumus 2014	pretest	72.57	5.03	67	73	5.3	65	NSD	patient choose
	posttest	72.12	3.91	67	75.43	10.4	65
Chang 2005	pretest	86.69	13.65	32	90.25	10.65	32	CS	patient choose
	posttest	74.63	11.99	32	82	12.48	32
Lee 2004	pretest	78	8.5	25	97	11.8	25	CS	not patient choose
	posttest	87	12.1	25	101	7.5	25
Hepp 2018	posttest	77.97	13.91	154	80.51	14.23	150	CS	patient choose

## Sheet: SBP
	article		meane	sde	ne	meanc	sdc	nc	delivery type	music type
	simvali, Gumus 2014	pretest	99.25	5.31	67	99.38	5.56	65	NSD	patient choose
		posttest	94.18	4.97	67	99.85	15.46	65
	Chang 2005	pretest	131.72	18.03	32	126.16	15.9	32	CS	patient choose
		posttest	122.31	14.81	32	121.41	12.24	32
	Lee 2004	pretest	121	8.8	25	135	9.8	25	CS	not patient choose
		posttest	142	9.1	25	150	8.8	25
	Hepp 2018	posttest	121.42	12.89	154	121.58	13	150	CS	patient choose

## Sheet: DBP
article		meane	sde	ne	meanc	sdc	nc	delivery type	music type
simvali, Gumus 2014	pretest	62.84	4.54	67	63.08	4.65	65	NSD	patient choose
	posttest	59.4	2.39	67	63.68	10.65	65
Chang 2005	pretest	80.34	15.85	32	77	12.86	32	CS	patient choose
	posttest	71.94	10.53	32	72.03	9.47	32
Lee 2004	pretest	71	7.5	25	74	3.3	25	CS	not patient choose
	posttest	81	13	25	80	7.7	25
Hepp 2018	posttest	77.97	13.91	154	80.51	14.23	150	CS	patient choose
